# Supplementary material for: Taf14 recognizes a common motif in transcriptional machineries and facilitates their clustering by phase separation
Source: Springer Nature journal article supplement (doi:10.1038/s41467-020-18021-7), 2020-08-21
Supplement: MOESM1 [file 41467_2020_18021_MOESM1_ESM.pdf]

Supplementary Information

**Taf14 recognizes a common motif in transcriptional machineries and facilitates their  
clustering by phase separation**

Guochao Chen, Duo Wang, Bin Wu et al.

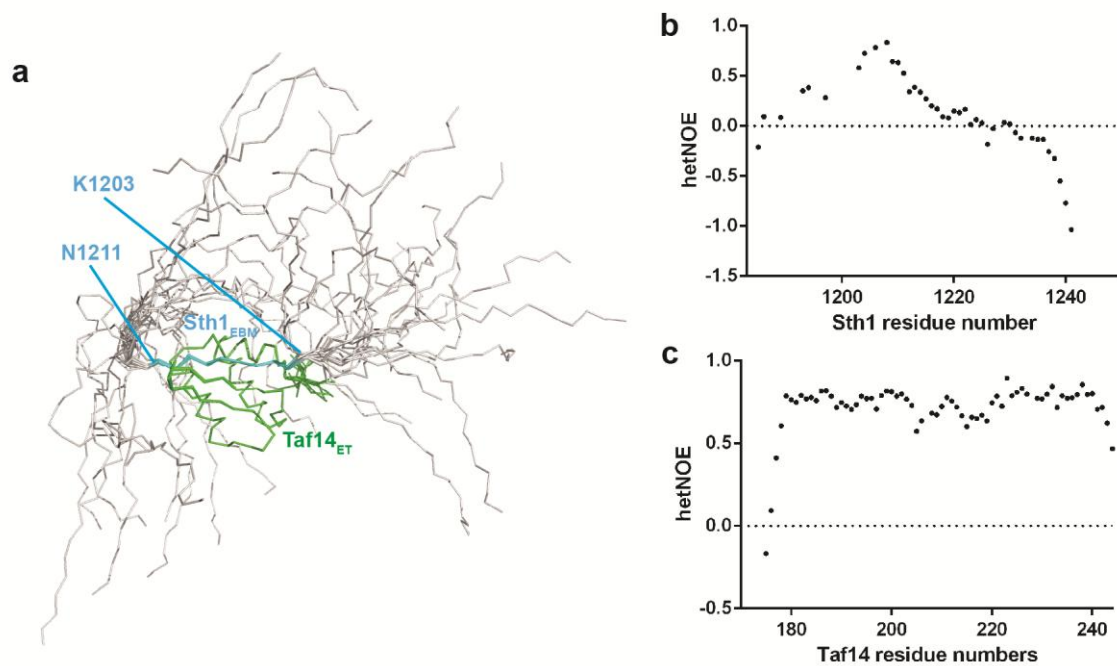

### Supplementary Figure 1. NMR analyses of Taf14<sub>ET</sub>-Sth1<sub>EBM</sub> complex

- The ensemble of the 20 lowest energy conformers of the Taf14<sub>ET</sub>-Sth1<sub>EBM</sub> complex. Taf14<sub>ET</sub> is shown in green. The core regions of Sth1<sub>EBM</sub> converge from K1203 to N1211. Other parts of Sth1<sub>EBM</sub> are flexible.
- Heteronuclear NOE values measured at 25 °C for <sup>15</sup>N-labeled Sth1<sub>EBM</sub> in complex with unlabeled Taf14<sub>ET</sub>.
- Heteronuclear NOE values measured at 25 °C for <sup>15</sup>N-labeled Taf14<sub>ET</sub> in complex with unlabeled Sth1<sub>EBM</sub>.

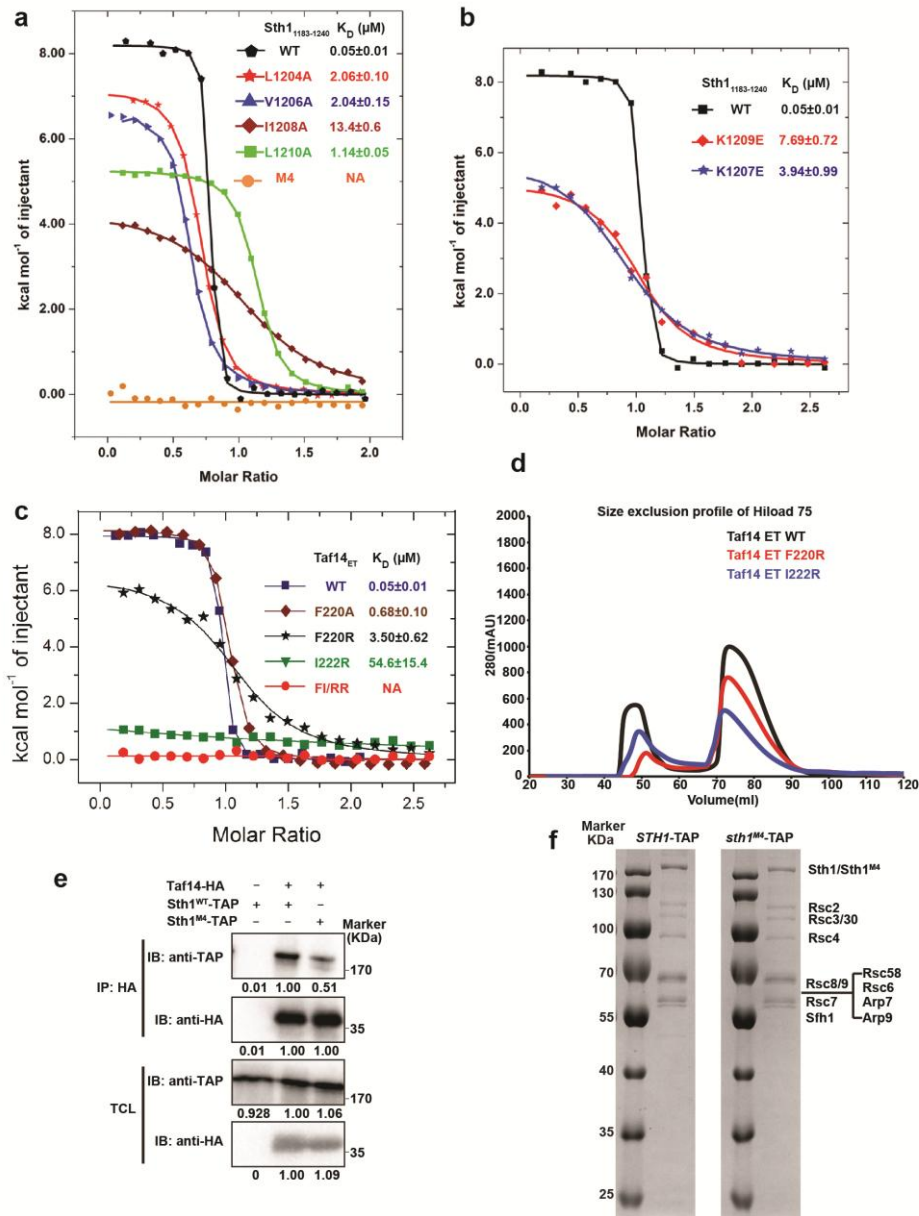

**Supplementary Figure 2. Mutation analyses of Taf14-Sth1 complex.**

- ITC assays show that mutations of hydrophobic residues of Sth1 decrease the interaction between Taf14<sub>ET</sub> and Sth1<sub>EBM</sub>.
- ITC assays show that mutations of positively charged residues of Sth1 decrease the interaction between Taf14<sub>ET</sub> and Sth1<sub>EBM</sub>.
- ITC assays show that mutations of hydrophobic residues of Taf14 decrease the interaction between Taf14<sub>ET</sub> and Sth1<sub>EBM</sub>.

- d. Gel-filtration profiles of Taf14<sub>ET</sub> mutations showed that these mutations did not affect the overall structural integrity of Taf14<sub>ET</sub>.
- e. Another batch of co-immunoprecipitation experiment using an HA antibody showed that Sth1<sup>M4</sup> mutation weakened the interaction with Taf14. Taf14 was tagged with HA; Sth1 was tagged with TAP. TCL, total cell lysate; IP, immunoprecipitation; IB, immune-blot.
- f. TAP purification shows that *sth1*<sup>M4</sup> mutation does not affect the integrity of the RSC complex.

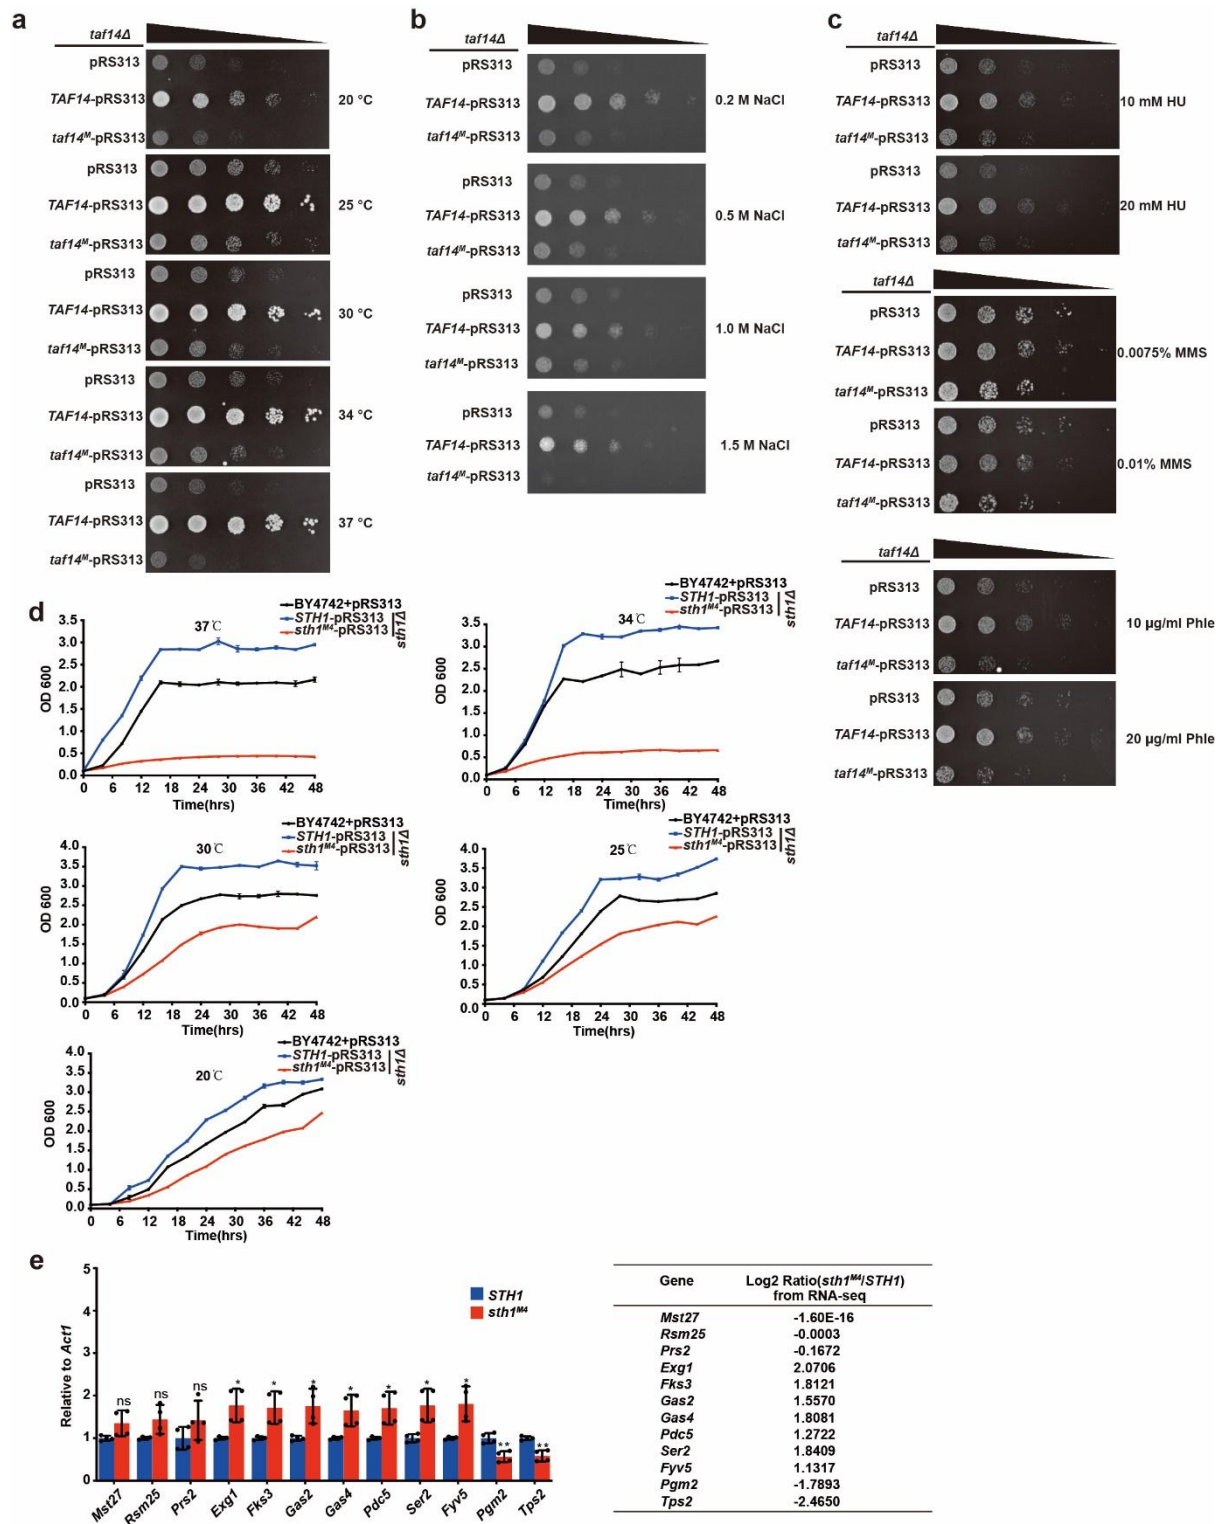

Supplementary Figure 3. Functional analyses of Taf14 and Sth1 mutations in yeast cells.

- a. Spotting assays with *taf14* $\Delta$  and *taf14*<sup>M</sup> strains compared with WT strains at various temperatures. The *taf14*<sup>M</sup> is Taf14 F220R/I222R mutation that disrupts Sth1<sub>EBM</sub> binding. The *taf14* $\Delta$  and *taf14*<sup>M</sup> strains showed growth defects at all the temperatures.
- b. Spotting assays with *taf14* $\Delta$  and *taf14*<sup>M</sup> strains compared with WT strains on plates containing different NaCl concentrations at 30 °C. The *taf14* $\Delta$  and *taf14*<sup>M</sup> strains showed growth defects at all the NaCl concentrations.
- c. Spotting assays with *taf14* $\Delta$  and *taf14*<sup>M</sup> strains compared with WT strains on plates containing indicated DNA-damage agents at 30 °C.
- d. Growth curves at *STH1* and *sth1*<sup>M4</sup> at different temperatures. The *sth1*<sup>M4</sup> mutant showed much delayed growth when the temperature was above 30 °C, but had similar (albeit slightly slow) growth rate compared to the WT strains. Data are presented as mean  $\pm$ SD, n = 3.
- e. The qPCR validation of the RNA-seq results. The change levels from RNA-seq were shown. Error bars represent standard deviations of four replicates. The relative expression level of wild-type *STH1* strain genes was set to 1. \**P* < 0.05; \*\**P* < 0.01; \*\*\**P* < 0.001; \*\*\*\**P* < 0.0001. Two-tailed Student's *t*-test. Data are presented as mean  $\pm$ SD, n = 4.

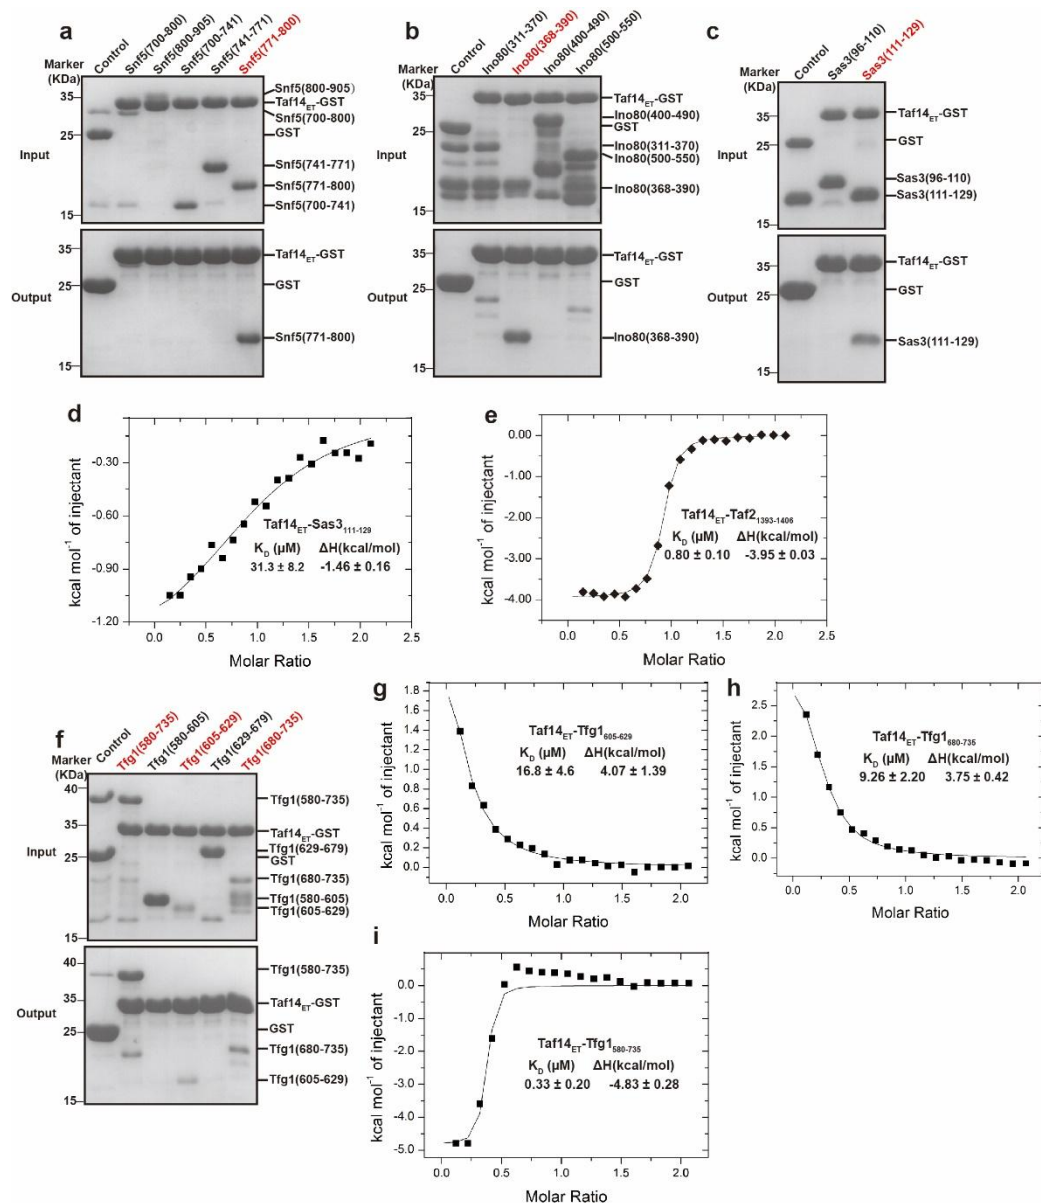

**Supplementary Figure 4. GST pull-down assays to map the Taf14<sub>ET</sub>-binding fragments.**

- Mapping the Taf14<sub>ET</sub>-interaction regions of Snf5. Snf5<sub>771-800</sub> is pulled down by GST-Taf14<sub>ET</sub>. All the Snf5 proteins are Sumo-fusion proteins to increase the visibility of the short peptides on SDS-PAGE. The Snf5 fragment binding Taf14<sub>ET</sub> was labeled red. The input controls were shown as 10% of the total proteins used to pull-down assays.
- Mapping the Taf14<sub>ET</sub>-interaction regions of Ino80. Ino80<sub>368-390</sub> has the strongest interaction with GST-Taf14<sub>ET</sub>. All the Ino80 proteins are Sumo-fusion proteins to

increase the visibility of the short peptides on SDS-PAGE. The Ino80 fragment binding Taf14<sub>ET</sub> was labeled red.

- c. Mapping the Taf14<sub>ET</sub>-interaction regions of Sas3. Sas3<sub>111-129</sub> is pulled down by GST-Taf14<sub>ET</sub>. All the Sas3 proteins are Sumo-fusion proteins to increase the visibility of the short peptides on SDS-PAGE. The Sas3 fragment binding Taf14<sub>ET</sub> was labeled red.
- d. The ITC plot for Sas3<sub>111-129</sub> (1 mM) titrated into Taf14<sub>ET</sub> (0.1 mM). The dissociation constant ( $K_D$ ), enthalpy change ( $\Delta H$ ), and their fitting errors from this ITC plot were shown.
- e. The ITC plot for Taf2<sub>1393-1406</sub> (1 mM) titrated into Taf14<sub>ET</sub> (0.1 mM).
- f. Mapping the Taf14<sub>ET</sub>-interaction regions of Tfg1. Tfg1<sub>605-629</sub> and Tfg1<sub>680-735</sub> have weak interactions with GST-Taf14<sub>ET</sub>, while Tfg1<sub>580-735</sub> has a much stronger interaction with GST-Taf14<sub>ET</sub>. All the Tfg1 proteins are Sumo-fusion proteins to increase the visibility of the short peptides on SDS-PAGE. The Tfg1 fragments binding Taf14<sub>ET</sub> were labeled red.
- g. The ITC plot for Tfg1<sub>605-629</sub> (1 mM) titrated into Taf14<sub>ET</sub> (0.1 mM).
- h. The ITC plot for Tfg1<sub>680-735</sub> (1 mM) titrated into Taf14<sub>ET</sub> (0.1 mM).
- i. The ITC plot for Tfg1<sub>580-735</sub> (1 mM) titrated into Taf14<sub>ET</sub> (0.1 mM).

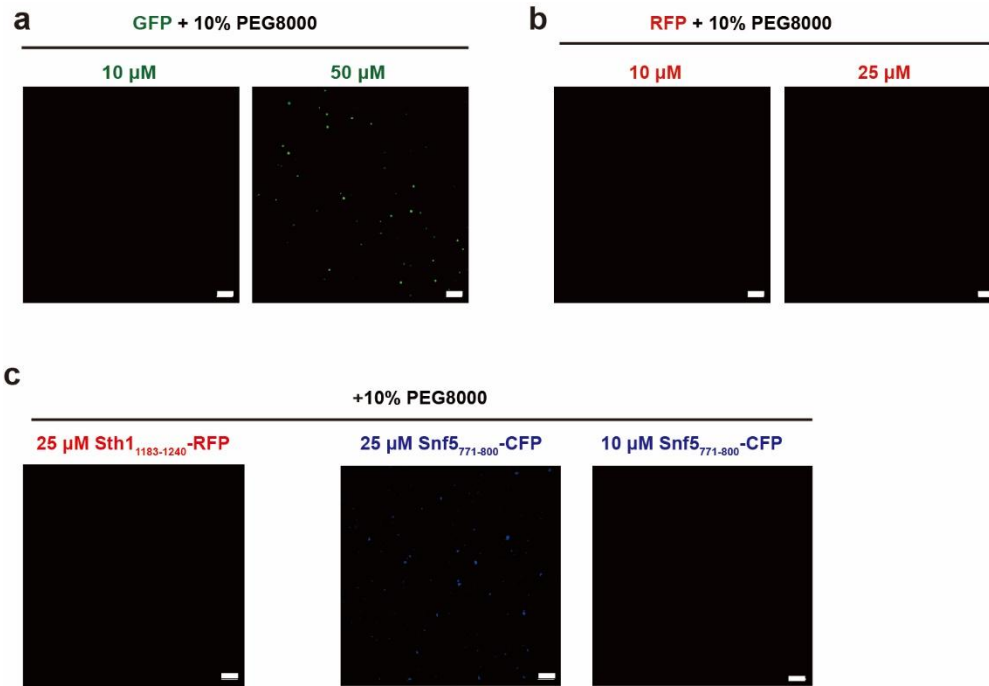

**Supplementary Figure 5. Phase separation of some control proteins.**

- a. Representative images of GFP at two different concentrations in the droplet formation buffer (25 mM Tris-HCl, pH 8.0, 150 mM NaCl, 10% PEG8000). GFP alone formed small droplets at 50  $\mu$ M concentration, but not at 25 (Fig.5a) or 10  $\mu$ M, so we kept the protein concentration below 25  $\mu$ M in the droplet formation assays.
- b. Representative images of RFP at two different concentrations in the droplet formation buffer (25 mM Tris-HCl, pH 8.0, 150 mM NaCl, 10% PEG8000). At these concentrations, RFP did not form any droplet.
- c. Representative images of Sth1<sub>1183-1240</sub>-RFP and Snf5<sub>771-800</sub>-CFP in the same droplet formation buffer. Sth1<sub>1183-1240</sub>-RFP did not form any droplet at 25  $\mu$ M concentration. It should be noted that Snf5<sub>771-800</sub>-CFP did not form any droplet at 10  $\mu$ M concentration but formed small non-spherical aggregates at 25  $\mu$ M concentration. So in the droplet formation assays with Snf5<sub>771-800</sub>-CFP, the protein concentration was kept below 10  $\mu$ M.

**Supplementary Table 1. *Saccharomyces cerevisiae* strains used in this study.**

| Names of strains                                   | Genotype                                                                                                                          |
|----------------------------------------------------|-----------------------------------------------------------------------------------------------------------------------------------|
| Fig.2e and Supplementary Fig. 2e, 2f               |                                                                                                                                   |
| BY4742                                             | <i>MAT<math>\alpha</math> his3<math>\Delta</math>1 leu2<math>\Delta</math>0 lys2<math>\Delta</math>0 ura3<math>\Delta</math>0</i> |
| BY4742-1 ( <i>TAF14-HA</i> )                       | BY4742 <i>TAF14-3HA::KanMX6</i>                                                                                                   |
| BY4742-2( <i>STH1-TAP/TAF14-HA</i> )               | BY4742 <i>STH1-TAP::URA3,TAF14-3HA ::KanMX6</i>                                                                                   |
| BY4742-2-Cas9 ( <i>STH1-TAP/TAF14-HA</i> )         | BY4742 <i>STH1-TAP::URA3,TAF14-3HA::KanMX6, pCas9</i>                                                                             |
| BY4742-3 ( <i>sth1<sup>M4</sup>-TAP/TAF14-HA</i> ) | BY4742 <i>sth1<sup>M4</sup>-TAP::URA3,TAF14-3HA::KanMX6</i>                                                                       |
| Fig. 3a-c, Supplementary Fig. 3d                   |                                                                                                                                   |
| BY4742-4 (pRS313)                                  | BY4742, pRS313                                                                                                                    |
| BY4742-5 ( <i>STH1</i> -pRS313)                    | BY haploid <i>sth1<math>\Delta</math> :: KanMX4, pRS313-STH1</i>                                                                  |
| BY4742-6 ( <i>sth1<sup>M4</sup></i> -pRS313)       | BY haploid <i>sth1<math>\Delta</math> :: KanMX4, pRS313-sth1<sup>M4</sup></i>                                                     |
| Supplementary Figure 3a-c                          |                                                                                                                                   |
| BY4742-7 (pRS313)                                  | BY4742 <i>taf14<math>\Delta</math> :: KanMX4, pRS313</i>                                                                          |
| BY4742-8 ( <i>TAF14</i> -pRS313)                   | BY4742 <i>taf14<math>\Delta</math> :: KanMX4, pRS313-TAF14</i>                                                                    |
| BY4742-9 ( <i>taf14<sup>M</sup></i> -pRS313)       | BY4742 <i>taf14<math>\Delta</math> :: KanMX4, pRS313-taf14<sup>M</sup></i>                                                        |

**Supplementary Table 2. Plasmids used in this study.**

| Names of plasmids                                | Purpose                                                                    |
|--------------------------------------------------|----------------------------------------------------------------------------|
| Fig. 1                                           |                                                                            |
| pet28b-Sth1 <sub>(1183-1359)</sub>               | Purification of Sth1 fragments 1183-1259                                   |
| pet28b-Sth1 <sub>(1183-1240)</sub>               | Purification of Sth1 fragments 1183-1240                                   |
| pet28b-Sth1 <sub>(1248-1359)</sub>               | Purification of Sth1 fragments 1248-1359                                   |
| pet28b-Sth1 <sub>(1199-1225)</sub>               | Purification of Sth1 fragments 1199-1225                                   |
| pGEX6P-1-Taf14 <sub>174-244</sub>                | Purification of Taf14 ET domain                                            |
| Fig. 2 and Supplementary Fig. 2                  |                                                                            |
| pet28b-Sth1 <sub>(1183-1240)</sub> L1204A        | Purification of Sth1 <sub>EBM</sub> mutant L1204A                          |
| pet28b-Sth1 <sub>(1183-1240)</sub> V1206A        | Purification of Sth1 <sub>EBM</sub> mutant V1206A                          |
| pet28b-Sth1 <sub>(1183-1240)</sub> I1208A        | Purification of Sth1 <sub>EBM</sub> mutant I1208A                          |
| pet28b-Sth1 <sub>(1183-1240)</sub> L1210A        | Purification of Sth1 <sub>EBM</sub> mutant L1210A                          |
| pet28b-Sth1 <sub>(1183-1240)</sub> <sup>M4</sup> | Purification of Sth1 <sub>EBM</sub> <sup>L1204A/V1206A/I1208A/L1210A</sup> |
| pet28b-Sth1 <sub>(1183-1240)</sub> K1207E        | Purification of Sth1 <sub>EBM</sub> mutant K1207E                          |
| pet28b-Sth1 <sub>(1183-1240)</sub> K1209E        | Purification of Sth1 <sub>EBM</sub> mutant K1209E                          |
| pGEX6P-1-Taf14 <sub>174-244</sub> F220A          | Purification of Taf14 <sub>ET</sub> mutant F220A                           |
| pGEX6P-1-Taf14 <sub>174-244</sub> F220R          | Purification of Taf14 <sub>ET</sub> mutant F220R                           |
| pGEX6P-1-Taf14 <sub>174-244</sub> I222R          | Purification of Taf14 <sub>ET</sub> mutant I222R                           |
| pGEX6P-1-Taf14 <sub>174-244</sub> F220R/I222R    | Purification of Taf14 <sub>ET</sub> mutant F220R/I222R                     |
| Fig. 4 and Supplementary Fig. 4                  |                                                                            |
| pet28b-Sth1 <sub>(700-800)</sub>                 | Purification of Snf5 fragments with Sumo tag                               |
| pet28b-Snf5 <sub>(800-905)</sub>                 | Purification of Snf5 fragments with Sumo tag                               |
| pet28b-Snf5 <sub>(700-741)</sub>                 | Purification of Snf5 fragments with Sumo tag                               |
| pet28b-Snf5 <sub>(771-800)</sub>                 | Purification of Snf5 fragments with Sumo tag                               |
| pet28b-Ino80 <sub>(311-370)</sub>                | Purification of Ino80 fragments with Sumo tag                              |
| pet28b-Ino80 <sub>(368-390)</sub>                | Purification of Ino80 fragments with Sumo tag                              |
| pet28b-Ino80 <sub>(400-490)</sub>                | Purification of Ino80 fragments with Sumo tag                              |
| pet28b-Ino80 <sub>(500-550)</sub>                | Purification of Ino80 fragments with Sumo tag                              |
| pet28b-Sas3 <sub>(96-110)</sub>                  | Purification of Sas3 fragments with Sumo tag                               |
| pet28b-Sas3 <sub>(111-129)</sub>                 | Purification of Sas3 fragments with Sumo tag                               |
| pet28b-Tfg1 <sub>(580-735)</sub>                 | Purification of Tfg1 fragments with Sumo tag                               |
| pet28b-Tfg1 <sub>(580-605)</sub>                 | Purification of Tfg1 fragments with Sumo tag                               |
| pet28b-Tfg1 <sub>(629-679)</sub>                 | Purification of Tfg1 fragments with Sumo tag                               |
| pet28b-Tfg1 <sub>(680-735)</sub>                 | Purification of Tfg1 fragments with Sumo tag                               |
| Fig. 5 and Supplementary Fig. 5                  |                                                                            |
| pet28b-GFP                                       | Purification of GFP                                                        |
| pet28b-RFP                                       | Purification of RFP                                                        |
| pet28b-CFP                                       | Purification of CFP                                                        |
| pet28b-Taf14 <sub>174-244</sub> -GFP             | Purification of Taf14 <sub>ET</sub> with C-terminal GFP                    |
| pet28b-Sth1 <sub>(1183-1240)</sub> -RFP          | Purification of Sth1 <sub>EBM</sub> with C-terminal RFP                    |
| pet28b-Snf5 <sub>(771-800)</sub> -CFP            | Purification of Snf5 <sub>EBM</sub> with C-terminal CFP                    |
| Fig. 6                                           |                                                                            |
| pGEX6P-1-Bdf1 <sub>525-595</sub>                 | Purification of Bdf1 ET domain with GST tag                                |
| pGEX6P-1-Bdf2 <sub>514-585</sub>                 | Purification of Bdf2 ET domain with GST tag                                |
| pGEX6P-1-AF9 <sub>490-568</sub>                  | Purification of AF9 ET domain with GST tag                                 |
| pet28b-AF9 <sub>490-568</sub> -GFP               | Purification of AF9 <sub>ET</sub> with C-terminal GFP                      |
| pet28b-BRD <sub>601-683</sub> -GFP               | Purification of BRD4 <sub>ET</sub> with C-terminal GFP                     |

**Supplementary Table 3. Primers used in this study.**

| Names of constructs                       | primer sequence 5'-3'                                                                                                                   |
|-------------------------------------------|-----------------------------------------------------------------------------------------------------------------------------------------|
| Fig. 1                                    |                                                                                                                                         |
| Sth1 <sub>(1183-1359)</sub>               | F:GCGCGGATCCGAAGTGAAAAGCTCTAGTGTTG<br>R: GCGCCTCGAGTTATGAGGAGTGTCTTTAAACCATTC                                                           |
| Sth1 <sub>(1183-1240)</sub>               | F: GCGCGGATCCGAAGTGAAAAGCTCTAGTGTTG<br>R:GCGCCTCGAGTTACTTCGCAGCGGTTTTCTTCGCC                                                            |
| Sth1 <sub>(1248-1359)</sub>               | F: GCGCAGATCTTCGCTTGGGATTTTTCCCACG<br>R:GCGCCTCGAGTTACGAAGAGTGTTCCTTGAACCATTCATCAG<br>TAAACTCATTTAACTTGTGAGCATCAACGTAAACCCAGGAGCC<br>TC |
| Sth1 <sub>(1199-1225)</sub>               | F: GCGCGGATCCAAGAAAAACCGAAACTGACCG<br>R:GCCGCTCGAGTTAATATTCAGCGCGTTTACCATCATTGTTTT<br>CAG                                               |
| Taf14 <sub>(174-244)</sub>                | F: GCGCGGATCCAAGGGAGCGTGGACCTAG<br>R: GCCGCTCGAGTTACTCGGTATTTTTCTTAACGTAGTC                                                             |
| Fig. 2 and Supplementary Fig. 2           |                                                                                                                                         |
| Sth1 <sub>(1183-1240)</sub> L1204A        | F:CAAAAAGAAAAACCGAAAGCAACCGTTAAAATCAA<br>ACTGACAAAACCACGGTCCTGG<br>R: CTTTCAGAGCCGTTGATAATTTCAAC                                        |
| Sth1 <sub>(1183-1240)</sub> V1206A        | F:CAAAAAGAAAAACCGAAACTGACCGCAAAAATCAA<br>ACTGACAAAACCACGGTCCTGG<br>R: CTTTCAGAGCCGTTGATAATTTCAAC                                        |
| Sth1 <sub>(1183-1240)</sub> I1208A        | F:CAAAAAGAAAAACCGAAACTGACCGTTAAAGCAA<br>AACTGACAAAACCACGGTCCTGG<br>R: CTTTCAGAGCCGTTGATAATTTCAAC                                        |
| Sth1 <sub>(1183-1240)</sub> L1210A        | F:CAAAAAGAAAAACCGAAACTGACCGTTAAAATCAA<br>AGCAAACAAAACCACGGTCCTGG<br>R: CTTTCAGAGCCGTTGATAATTTCAAC                                       |
| Sth1 <sub>(1183-1240)</sub> <sup>M4</sup> | F:CAAAAAGAAAAACCGAAAGCAACCGCAAAAAGCAA<br>AAGCAAACAAAACCACGGTCCTGG<br>R: CTTTCAGAGCCGTTGATAATTTCAAC                                      |
| Sth1 <sub>(1183-1240)</sub> K1207E        | F:CAAAAAGAAAAACCGAAACTGACCGTTGAAATCAA<br>ACTGACAAAACCACGGTCCTGG<br>R: CTTTCAGAGCCGTTGATAATTTCAAC                                        |
| Sth1 <sub>(1183-1240)</sub> K1209E        | F:CAAAAAGAAAAACCGAAACTGACCGTTAAAATCGA<br>AACTGACAAAACCACGGTCCTGG<br>R: CTTTCAGAGCCGTTGATAATTTCAAC                                       |
| Taf14 <sub>(174-244)</sub> F220A          | F:GAATAATGTTGAAGAGGGTGAAGCAATAATTGACT<br>TGTATAGTTTACCTGAG<br>R: GTCACGTTCAATTTCTGGTGTGTTTTATTGTC                                       |
| Taf14 <sub>(174-244)</sub> F220R          | F:GAATAATGTTGAAGAGGGTGAACGTATAATTGACT<br>TGTATAGTTTACCTGAG<br>R: GTCACGTTCAATTTCTGGTGTGTTTTATTGTC                                       |
| Taf14 <sub>(174-244)</sub> I222R          | F:GAATAATGTTGAAGAGGGTGAATTTATACGTGACT<br>TGTATAGTTTACCTGAG<br>R: GTCACGTTCAATTTCTGGTGTGTTTTATTGTC                                       |
| Taf14 <sub>(174-244)</sub><br>F220R/I222R | F:GAATAATGTTGAAGAGGGTGAACGTATAACGTGACT<br>TGTATAGTTTACCTGAG<br>R: GTCACGTTCAATTTCTGGTGTGTTTTATTGTC                                      |
| Sth1 <sup>M4</sup> -gRNA                  | F1:CGGAATCCTCTTTGAAAAGATAATGTATGATTATG<br>CTTTC<br>R1:GCTCTAAAACAACTGACCGTCAAGATCAAGATCAT<br>TTTATC<br>TTTCACTGCGGAGAAG                 |

|                                 |                                                                                                                                                                        |
|---------------------------------|------------------------------------------------------------------------------------------------------------------------------------------------------------------------|
|                                 | F2:ATGATCTTGATCTTGACGGTCAGTTTGTTTTAGAGCTAGAAA<br>TAGCAAGTTAAAATAAG<br>R2:AAGGAAAAAAGCGGCCGCAGACATAAAAAACAAAAAAGC<br>ACCACCG                                            |
| Sth1-TAP                        | F:TTAAATGAGTTTACTGATGAATGGTTCAAGGAACACTCTTCG<br>TCCATGGAAAAGAGAAG<br>R:GGATATAGTCGTAAAAAATAACATGTGGTGATGAAAAC<br>GTACGACTCACTATAGGG                                    |
| Taf14-HA                        | F:ATTGAAAAGTCTATGGGACTACGTTAAGAAAAATACCGAGCG<br>GATCCCCGGGTTAATTAA<br>R:ATACAAACATAAAAGCGCGCATTAAACGCCCTTTTACCTTGA<br>ATTCGAGCTCGTTAAAC                                |
| Fig. 3 and Supplementary Fig. 3 |                                                                                                                                                                        |
| Sth1-pRS313                     | F: GGACTAGTCACTAGAGTCTTCCTCGTCGC<br>R: CTCGAGGATGCTGAACGAGAATCGCTTC                                                                                                    |
| Taf14-pRS313                    | F1: CCCCCGGGGGATTCTTCTCTAGAATGGCA<br>R1:CGGATGGTTCTTTTTACTGTAGCTACCATGATTAGTTATCT<br>F2:GATAACTAATCATGGTAGCTACAGTAAAAAGAACCATCCG<br>R2: CCCTCGAGGG TCAAACATCAAGAGGATTC |
| Act1                            | F: TCGTTCCAATTTACGCTGGTT<br>R: CGGCCAAATCGATTCTCAA                                                                                                                     |
| Mgm1                            | F: AAAGTCCGTTGGTGCACCTTACA<br>R: TGGCATGTGCTGATCTGTGA                                                                                                                  |
| Tir4                            | F: TGCCGACTACATCACCTATCC<br>R: GGCATTTGGTCCAAGGAAAA                                                                                                                    |
| Yml045w                         | F: GAAATCCGAGTGATGAGAAGAATGA<br>R: CCGAGCTATAACTTTGGGTTTG                                                                                                              |
| Hlr1                            | F: GGAGAACCCCTCCACGTATACA<br>R: TCGTCGGCAAATGACACTTT                                                                                                                   |
| Hsp30                           | F: ACCATGCTACGGACGATGTG<br>R: GCTCTCTGGAACAGCTTCTTTTG                                                                                                                  |
| Tps1                            | F: TTGCACGCCATGGAAGTG<br>R: AACAACTTGCCCCTCCATT                                                                                                                        |
| Gpx1                            | F: TGCAACGGGCAAAGCA<br>R: CAGACTTCCCGCTTACTGAATTC                                                                                                                      |
| Mst27                           | F: CAAGGCAGCGGAGATCGA<br>R: GCCGCCTTCGCCAGTAA                                                                                                                          |
| Rsm25                           | F: TGGGCGTGAAAAGGCTGTA<br>R: GCGATCTGAGCCTATCCTCAA                                                                                                                     |
| Prs2                            | F: CCACACCGGAGATCCTTTTG<br>R: TCTTGGAACCCGCATTGC                                                                                                                       |
| Exg1                            | F: CCATCGGTTGGGCTAGAAAC<br>R: CGGCACCATGCAAATCAA                                                                                                                       |
| Fks3                            | F: ACTTGGGTGCGTTGAACCA<br>R: CAACGGGTGTCTCAAGATTTGTAA                                                                                                                  |
| Gas2                            | F: GCGCCTGTTTGGATGAGATT<br>R: TCCAGATTCAGCACCAAAAGG                                                                                                                    |
| Gas4                            | F: GGCTCTCCGACGTTAGTGAA<br>R: GAGCGCATGCATCTGGATT                                                                                                                      |
| Pdc5                            | F: TTGGGACCACTTGGCCTTATT<br>R: GGTAGCAACTCTGTGGGTTTCG                                                                                                                  |
| Ser2                            | F: TTTGTTATCACCTGCATAGCTCATG<br>R: TCGCAATCTGGTCGATGGT                                                                                                                 |

|                                    |                                                                                                                              |
|------------------------------------|------------------------------------------------------------------------------------------------------------------------------|
| Fyv5                               | F: TCTGTCCGAATTTGCTCTCGTA<br>R: RGCCGAGGAGCTGATCAAG                                                                          |
| Pgm2                               | F: GGTTACGGCCCATCTTTCGT<br>R: GCTGCATATTCGGCAATAATTG                                                                         |
| Tps2                               | F: CACTGTGGGATCTGCATCCA<br>R: GGACTTGCTGAGGATCGGTAA                                                                          |
| Fig. 4 and Supplementary Fig. 4    |                                                                                                                              |
| INO80 <sub>(368-390)</sub>         | F: GCGCGGATCCGATTCCAAGTTGAACATCAAAATAAC<br>R: GCGCTCGAGTTAGTTAATCAGTTTTTCAACCTTTTGAC                                         |
| Ino80 <sub>(311-370)</sub>         | F: CGGGATCCATGAACTCGCTGTCTTTAATAACG<br>R: CGCTCGAGTACTTGGAAATCGATTGGATTGTA                                                   |
| Ino80 <sub>(400-490)</sub>         | F: CGGGATCCGAGGCCTTGAAGAACAACGTTGG<br>R: CGCTCGAGTTATCTTGACATTTTCGTAGAATCC                                                   |
| Ino80 <sub>(500-550)</sub>         | F: CGGGATCCTCTACAAATTTTAGGAAAACCTC<br>R: CGCTCGAGTTATTCTTCACGCTCATTCTTCTTCC                                                  |
| Ino80 <sub>EBM</sub> L371A         | F: GCAAACATCAAAATAACTTTGAAACAG<br>R: CTTGGAATCGATTGGATTG                                                                     |
| Ino80 <sub>EBM</sub> I373A         | F: GCAAAAATAACTTTGAAACAGTACCAC<br>R: GTTCAACTTGGAAATCGATTGGATT                                                               |
| Ino80 <sub>EBM</sub> I375A         | F: GCAACTTTGAAACAGTACCACGTC<br>R: TTTGATGTTCAACTTGGAAATC                                                                     |
| Ino80 <sub>EBM</sub> L377A         | F: GCAAAACAGTACCACGTCAAAAGGTT<br>R: AGTTATTTTGATGTTCAACTTGGAA                                                                |
| Ino80 <sub>EBM</sub> <sup>M4</sup> | F: GCAAACGCAAAAGCAACTGCAAAACAGTACCACGTCAAAAG<br>GTT<br>R: CTTGGAATCGATTGGATTG                                                |
| Sas3 <sub>(111-129)</sub>          | F: GCGCGGATCCAGCGAGGAGTTGAAGGTTAGAATTAAG<br>R: GCGCTCGAGTTATTCAAATTTGAAAATTTGATAGAATC                                        |
| Sas3 <sub>(96-110)</sub>           | F: CGGGATCCATGGGAGCAGTAAGTTCCCATATTGAACCTA<br>ATATTGAAGTC<br>R: CGCTCGAGTTAGACTTCAATATTAGGTTCAATAATGGGGAAA<br>CTTACTGCTCCCAT |
| Snf5 <sub>(771-800)</sub>          | F: CGGGATCCGCCAGATAGACCTAAGCCAGTT<br>R: CGCTCGAGTACTCTTCTTTTGTATTAACCTTCC                                                    |
| Snf5 <sub>(700-800)</sub>          | F: CGGGATCCACACAGTAGCAGCAGGAAATGC<br>R: CGCTCGAGTACTCTTCTTTTGTATTAACCTTCCC                                                   |
| Snf5 <sub>(800-905)</sub>          | F: CGGGATCCGAGTTCGCAGCAGCGCCCAATG<br>R: CGCTCGAGTACTATGTATTCTGTGTGTTATTGTTACTGC                                              |
| Snf5 <sub>(700-741)</sub>          | F: CGGGATCCACACAGTAGCAGCAGGAAATGC<br>R: CGCTCGAGTTAACCAGGCATTAAGTGCTAGG                                                      |
| Snf5 <sub>(741-771)</sub>          | F: CGGGATCCGGTGGTGTTGACGTAGGCCCTTC<br>R: CGCTCGAGTTATGAAACTGGCTTAGGTCTATCTGGCCT                                              |
| Snf5 <sub>EBM</sub> L785A          | F: GCACTACTTTCTATTAACCTGCCTG<br>R: CGAATGACCCGGAATATGG                                                                       |
| Snf5 <sub>EBM</sub> L787A          | F: GCATCTATTAACCTGCCTGGGAAAG<br>R: TAGTAGCGAATGACCCGGAATATG                                                                  |
| Snf5 <sub>EBM</sub> I789A          | F: GCAAAACTGCCTGGGAAAGTTAATAC<br>R: AGAAAGTAGTAGCGAATGACCCGG                                                                 |
| Snf5 <sub>EBM</sub> L791A          | F: GCACCTGGGAAAGTTAATACAAAAGA<br>R: TTTAATAGAAAGTAGTAGCGAATGAC                                                               |
| Snf5 <sub>EBM</sub> <sup>M4</sup>  | F: GCACTAGCATCTGCAAAAGCACCTGGGAAAGTTAA<br>R: CGAATGACCCGGAATATGGTC                                                           |
| Taf2 <sub>(1393-1406)</sub>        | F: CGGGATCCTCAAGATCGTTTATGGTTAAGATAAGAACAAAGA                                                                                |

|                                  |                                                                                                                                                                                                     |
|----------------------------------|-----------------------------------------------------------------------------------------------------------------------------------------------------------------------------------------------------|
|                                  | ATGATGCTAAG<br>R:CGCTCGAGTAACTTAGCATCATTCTTTGTTCTTATCTTAACCA<br>TAAACGATCTTGA                                                                                                                       |
| Tfg1 <sub>(580-605)</sub>        | F:CGGGATCCGACACTCTATCCAAATCCAAGAGATCTTCTCAA<br>AGAAACAGCAAAGAAAGCTACAAATGCGCATGTGCATAAAG<br>AG<br>R:CGCTCGAGTTACTCTTTATGCACATGCGCATTGTAGCTTTCT<br>TTTGCTGTTTCTTTGGAGAAGATCTCTTGGATTGGATAGAGTG<br>TC |
| Tfg1 <sub>(605-629)</sub>        | F:CGGGATCCGAGCCAACCTTTGAGGGTGAAAAGTATTA AAAACT<br>GTGTCATTATCTTGAAGGGGGATAAGAAAATACTGAAAAGC<br>R:CGCTCGAGTTAGCTTTTCAGTATTTTCTTATCCCCCTTCAAGA<br>TAATGACACAGTTTTTAATACTTTTCACCCTCAAAGTTGGCTC         |
| Tfg1 <sub>(629-679)</sub>        | F:CGGGATCCAGCTTCCAGAGGGAGAA<br>R: CGCTCGAGTTATGTTATTGTAGGCGCTGGAGTTTC                                                                                                                               |
| Tfg1 <sub>(580-735)</sub>        | F: GCGCGGATCCGACACTCTATCCAAATCCAAGAGATC<br>R: GCGCCTCGAGTTACTCTTTCTTTAATTCCATGTGGTC                                                                                                                 |
| Tfg1 <sub>(680-735)</sub>        | F: GCGC GGATCC GAAAAGATATCATCGAGGCTATTG<br>R: GCGCCTCGAGTTACTCTTTCTTTAATTCCATGTGGTC                                                                                                                 |
| Fig. 5 and Supplementary Fig. 5  |                                                                                                                                                                                                     |
| Sth1 <sub>(1183-1240)</sub> -RFP | F1:CGGGATCCGAAGTAAAAAGTAGCTCCGTTG<br>R1:CCTCGGAGGAGGCTTTGGCGTCAGTCTTCTTCGCG<br>F2:GACTGCAGCCAAAGCCTCCTCCGAGGACGTCATC<br>R2:CCGCTCGAGTTAGGCGCCGGTGGAGTGGC                                            |
| Snf5 <sub>(771-800)</sub> -CFP   | F1:ATGTCGGA CT CAGAAGTCAATC<br>R1:AAAAGTTCTTCTCCTTTGCTCTCTTCTTTGTATTA ACTTTCC<br>CAGGC<br>F2:AAGTTAATA CAAAAGAAGAGAGCAAAGGAGAAGAACTTTTC<br>AC<br>R2:CCGCTCGAGTTATTTGTAGAGCTCATCCATGCCA              |
| Taf14 <sub>(174-244)</sub> -GFP  | F:CGGGATCCAAAGGGACGGTGGACCTAGAA<br>R:CCGCTCGAGCTCGGTATTTTTCTTAACGTAGTCC                                                                                                                             |
| Fig. 6                           |                                                                                                                                                                                                     |
| Bdf1 <sub>(525-595)</sub>        | F: GCGCGGATCCAAAACAGTAGTGACATATGATATG<br>R: GCCGCTCGAGTTAGGATGAGCTTTCATATTGTCTAAAG                                                                                                                  |
| Bdf2 <sub>(514-585)</sub>        | F: GCGC GGATCC AAGCATTCAGTTGACGATTTAAAG<br>R:GCCGCTCGAGTTAGTTATTTTTTTTCTCAAATATCTCTC                                                                                                                |
| AF9 <sub>(490-568)</sub>         | F: CGGGATCCTCAGATAAGCAAATAAAGAATGGTG<br>R: CCGCTCGAGTCAGGATGTTCCAGATGTTTCC                                                                                                                          |
| AF9 <sub>(490-568)</sub> -GFP    | F: CGGGATCCTCAGATAAGCAAATAAAGAATGGTG<br>R: CCGCTCGAGTCAGGATGTTCCAGATGTTTCC                                                                                                                          |
| BRD <sub>(601-683)</sub> -GFP    | F: CGGGATCCTCGGAGGAAGAGGACAAGTGC<br>R: CCGCTCGAGAGCTTGAGGTTTCCTTTTCTTCCG                                                                                                                            |
